# Supplementary material for: Development of a rapid and highly sensitive nucleic acid-based diagnostic test for schistosomes, leveraging on identical multi-repeat sequences
Source: Front Parasitol. 2024 Mar 14;3:1361493. doi: 10.3389/fpara.2024.1361493 (PMC11731689; doi:10.3389/fpara.2024.1361493)
Supplement: Supplementary file 4 [file Table_3.xls]

## Sheet: Sample Setup
Block Type	96-Well 0.2-mL Block
Calibration Background is expired	No
Calibration Background performed on	10-09-2021
Calibration Pure Dye ABY is expired	No
Calibration Pure Dye ABY performed on	10-09-2021
Calibration Pure Dye CY5 is expired	No
Calibration Pure Dye CY5 performed on	10-09-2021
Calibration Pure Dye FAM is expired	No
Calibration Pure Dye FAM performed on	10-09-2021
Calibration Pure Dye JUN is expired	No
Calibration Pure Dye JUN performed on	10-09-2021
Calibration Pure Dye MUSTANG PURPLE is expired	No
Calibration Pure Dye MUSTANG PURPLE performed on	10-09-2021
Calibration Pure Dye NED is expired	No
Calibration Pure Dye NED performed on	10-09-2021
Calibration Pure Dye ROX is expired	No
Calibration Pure Dye ROX performed on	10-09-2021
Calibration Pure Dye SYBR is expired	No
Calibration Pure Dye SYBR performed on	10-09-2021
Calibration Pure Dye TAMRA is expired	No
Calibration Pure Dye TAMRA performed on	10-09-2021
Calibration Pure Dye VIC is expired	No
Calibration Pure Dye VIC performed on	10-09-2021
Calibration ROI is expired	No
Calibration ROI performed on	10-08-2021
Calibration Uniformity is expired	No
Calibration Uniformity performed on	10-08-2021
Chemistry	TAQMAN
Date Created	2023-12-19 22:30:57 PM EAT
Experiment Barcode
Experiment Comment
Experiment File Name	C:\Users\OMBENI\OneDrive\Desktop\BIOINFORMATICS\Eds 3.eds
Experiment Name	2023-09-05_101140
Experiment Run End Time	2023-10-04 15:54:36 PM EAT
Experiment Type	Standard Curve
Instrument Name	SATREPS_QS5
Instrument Serial Number	272529713
Instrument Type	QuantStudio™ 5 System
Passive Reference	ROX
Post-read Stage/Step
Pre-read Stage/Step
Quantification Cycle Method	Ct
Signal Smoothing On	true
Stage/ Cycle where Ct Analysis is performed	Stage2, Step2
User Name
Well	Well Position	Sample Name	Sample Color	Biogroup Name	Biogroup Color	Target Name	Target Color	Task	Reporter	Quencher	Quantity	Comments
1	A1	S.man 1	RGB(0,0,255)	S.haematobium	RGB(0,245,255)	IMRS	RGB(176,23,31)	STANDARD	FAM	None	10
2	A2	S.man 1	RGB(0,0,255)	S.haematobium	RGB(0,245,255)	IMRS	RGB(176,23,31)	STANDARD	FAM	None	10
3	A3	S.man 1	RGB(0,0,255)	S.haematobium	RGB(0,245,255)	IMRS	RGB(176,23,31)	STANDARD	FAM	None	10
4	A4
5	A5	S.haem 1	RGB(238,238,0)			IMRS	RGB(176,23,31)	STANDARD	FAM	None	10
6	A6	S.haem 1	RGB(238,238,0)			IMRS	RGB(176,23,31)	STANDARD	FAM	None	10
7	A7	S.haem 1	RGB(238,238,0)			IMRS	RGB(176,23,31)	STANDARD	FAM	None	10
8	A8
9	A9
10	A10
11	A11
12	A12
13	B1	S.man 2	RGB(139,137,112)	S.haematobium	RGB(0,245,255)	IMRS	RGB(176,23,31)	STANDARD	FAM	None	1
14	B2	S.man 2	RGB(139,137,112)	S.haematobium	RGB(0,245,255)	IMRS	RGB(176,23,31)	STANDARD	FAM	None	1
15	B3	S.man 2	RGB(139,137,112)	S.haematobium	RGB(0,245,255)	IMRS	RGB(176,23,31)	STANDARD	FAM	None	1
16	B4
17	B5	S.haem 2	RGB(142,142,56)			IMRS	RGB(176,23,31)	STANDARD	FAM	None	1
18	B6	S.haem 2	RGB(142,142,56)			IMRS	RGB(176,23,31)	STANDARD	FAM	None	1
19	B7	S.haem 2	RGB(142,142,56)			IMRS	RGB(176,23,31)	STANDARD	FAM	None	1
20	B8
21	B9
22	B10
23	B11
24	B12
25	C1	S.man 3	RGB(238,121,66)	S.haematobium	RGB(0,245,255)	IMRS	RGB(176,23,31)	STANDARD	FAM	None	0.1
26	C2	S.man 3	RGB(238,121,66)	S.haematobium	RGB(0,245,255)	IMRS	RGB(176,23,31)	STANDARD	FAM	None	0.1
27	C3	S.man 3	RGB(238,121,66)	S.haematobium	RGB(0,245,255)	IMRS	RGB(176,23,31)	STANDARD	FAM	None	0.1
28	C4
29	C5	S.haem 3	RGB(238,44,44)			IMRS	RGB(176,23,31)	STANDARD	FAM	None	0.1
30	C6	S.haem 3	RGB(238,44,44)			IMRS	RGB(176,23,31)	STANDARD	FAM	None	0.1
31	C7	S.haem 3	RGB(238,44,44)			IMRS	RGB(176,23,31)	STANDARD	FAM	None	0.1
32	C8
33	C9
34	C10
35	C11
36	C12
37	D1	S.man 4	RGB(142,56,142)	S.haematobium	RGB(0,245,255)	IMRS	RGB(176,23,31)	STANDARD	FAM	None	0.01
38	D2	S.man 4	RGB(142,56,142)	S.haematobium	RGB(0,245,255)	IMRS	RGB(176,23,31)	STANDARD	FAM	None	0.01
39	D3	S.man 4	RGB(142,56,142)	S.haematobium	RGB(0,245,255)	IMRS	RGB(176,23,31)	STANDARD	FAM	None	0.01
40	D4
41	D5	S.haem 4	RGB(51,161,201)			IMRS	RGB(176,23,31)	STANDARD	FAM	None	0.01
42	D6	S.haem 4	RGB(51,161,201)			IMRS	RGB(176,23,31)	STANDARD	FAM	None	0.01
43	D7	S.haem 4	RGB(51,161,201)			IMRS	RGB(176,23,31)	STANDARD	FAM	None	0.01
44	D8
45	D9
46	D10
47	D11
48	D12
49	E1	S.man 5	RGB(198,113,113)	S.haematobium	RGB(0,245,255)	IMRS	RGB(176,23,31)	STANDARD	FAM	None	0.001
50	E2	S.man 5	RGB(198,113,113)	S.haematobium	RGB(0,245,255)	IMRS	RGB(176,23,31)	STANDARD	FAM	None	0.001
51	E3	S.man 5	RGB(198,113,113)	S.haematobium	RGB(0,245,255)	IMRS	RGB(176,23,31)	STANDARD	FAM	None	0.001
52	E4
53	E5	S.haem 5	RGB(238,18,137)			IMRS	RGB(176,23,31)	STANDARD	FAM	None	0.001
54	E6	S.haem 5	RGB(238,18,137)			IMRS	RGB(176,23,31)	STANDARD	FAM	None	0.001
55	E7	S.haem 5	RGB(238,18,137)			IMRS	RGB(176,23,31)	STANDARD	FAM	None	0.001
56	E8
57	E9
58	E10
59	E11
60	E12
61	F1	S.man 6	RGB(0,245,255)	S.haematobium	RGB(0,245,255)	IMRS	RGB(176,23,31)	STANDARD	FAM	None	0.0001
62	F2	S.man 6	RGB(0,245,255)	S.haematobium	RGB(0,245,255)	IMRS	RGB(176,23,31)	STANDARD	FAM	None	0.0001
63	F3	S.man 6	RGB(0,245,255)	S.haematobium	RGB(0,245,255)	IMRS	RGB(176,23,31)	STANDARD	FAM	None	0.0001
64	F4
65	F5	S.haem 6	RGB(176,23,31)			IMRS	RGB(176,23,31)	STANDARD	FAM	None	0.0001
66	F6	S.haem 6	RGB(176,23,31)			IMRS	RGB(176,23,31)	STANDARD	FAM	None	0.0001
67	F7	S.haem 6	RGB(176,23,31)			IMRS	RGB(176,23,31)	STANDARD	FAM	None	0.0001
68	F8
69	F9
70	F10
71	F11
72	F12
73	G1	A. Lumb1	RGB(176,23,31)			IMRS	RGB(176,23,31)	STANDARD	FAM	None	2
74	G2	A. Lumb1	RGB(176,23,31)			IMRS	RGB(176,23,31)	STANDARD	FAM	None	2
75	G3	A. Lumb1	RGB(176,23,31)			IMRS	RGB(176,23,31)	STANDARD	FAM	None	2
76	G4
77	G5	A. lumb2	RGB(0,0,255)			IMRS	RGB(176,23,31)	STANDARD	FAM	None	2
78	G6	A. lumb2	RGB(0,0,255)			IMRS	RGB(176,23,31)	STANDARD	FAM	None	2
79	G7	A. lumb2	RGB(0,0,255)			IMRS	RGB(176,23,31)	STANDARD	FAM	None	2
80	G8
81	G9
82	G10
83	G11
84	G12
85	H1	ntc	RGB(0,139,69)			IMRS	RGB(176,23,31)	NTC	FAM	None
86	H2	ntc	RGB(0,139,69)			IMRS	RGB(176,23,31)	NTC	FAM	None
87	H3	ntc	RGB(0,139,69)			IMRS	RGB(176,23,31)	NTC	FAM	None
88	H4
89	H5	ntc	RGB(0,139,69)			IMRS	RGB(176,23,31)	NTC	FAM	None
90	H6	ntc	RGB(0,139,69)			IMRS	RGB(176,23,31)	NTC	FAM	None
91	H7	ntc	RGB(0,139,69)			IMRS	RGB(176,23,31)	NTC	FAM	None
92	H8
93	H9
94	H10
95	H11
96	H12

## Sheet: Amplification Data
Block Type	96-Well 0.2-mL Block
Calibration Background is expired	No
Calibration Background performed on	10-09-2021
Calibration Pure Dye ABY is expired	No
Calibration Pure Dye ABY performed on	10-09-2021
Calibration Pure Dye CY5 is expired	No
Calibration Pure Dye CY5 performed on	10-09-2021
Calibration Pure Dye FAM is expired	No
Calibration Pure Dye FAM performed on	10-09-2021
Calibration Pure Dye JUN is expired	No
Calibration Pure Dye JUN performed on	10-09-2021
Calibration Pure Dye MUSTANG PURPLE is expired	No
Calibration Pure Dye MUSTANG PURPLE performed on	10-09-2021
Calibration Pure Dye NED is expired	No
Calibration Pure Dye NED performed on	10-09-2021
Calibration Pure Dye ROX is expired	No
Calibration Pure Dye ROX performed on	10-09-2021
Calibration Pure Dye SYBR is expired	No
Calibration Pure Dye SYBR performed on	10-09-2021
Calibration Pure Dye TAMRA is expired	No
Calibration Pure Dye TAMRA performed on	10-09-2021
Calibration Pure Dye VIC is expired	No
Calibration Pure Dye VIC performed on	10-09-2021
Calibration ROI is expired	No
Calibration ROI performed on	10-08-2021
Calibration Uniformity is expired	No
Calibration Uniformity performed on	10-08-2021
Chemistry	TAQMAN
Date Created	2023-12-19 22:30:57 PM EAT
Experiment Barcode
Experiment Comment
Experiment File Name	C:\Users\OMBENI\OneDrive\Desktop\BIOINFORMATICS\Eds 3.eds
Experiment Name	2023-09-05_101140
Experiment Run End Time	2023-10-04 15:54:36 PM EAT
Experiment Type	Standard Curve
Instrument Name	SATREPS_QS5
Instrument Serial Number	272529713
Instrument Type	QuantStudio™ 5 System
Passive Reference	ROX
Post-read Stage/Step
Pre-read Stage/Step
Quantification Cycle Method	Ct
Signal Smoothing On	true
Stage/ Cycle where Ct Analysis is performed	Stage2, Step2
User Name
Well	Well Position	Cycle	Target Name	Rn	Delta Rn
1	A1	1	IMRS	10.2672	-0.109025
1	A1	2	IMRS	10.3146	-0.0822996
1	A1	3	IMRS	10.3767	-0.0409758
1	A1	4	IMRS	10.4271	-0.0113259
1	A1	5	IMRS	10.495	0.0358678
1	A1	6	IMRS	10.5331	0.0532115
1	A1	7	IMRS	10.5119	0.0113387
1	A1	8	IMRS	10.498	-0.0232986
1	A1	9	IMRS	10.5172	-0.0248176
1	A1	10	IMRS	10.5202	-0.042532
1	A1	11	IMRS	10.5359	-0.0475634
1	A1	12	IMRS	10.5449	-0.0593783
1	A1	13	IMRS	10.5454	-0.0795769
1	A1	14	IMRS	10.6063	-0.0393994
1	A1	15	IMRS	10.6297	-0.0367061
1	A1	16	IMRS	10.6268	-0.060399
1	A1	17	IMRS	10.6295	-0.078409
1	A1	18	IMRS	10.6447	-0.083943
1	A1	19	IMRS	10.6581	-0.091246
1	A1	20	IMRS	10.6583	-0.111801
1	A1	21	IMRS	10.6286	-0.16219
1	A1	22	IMRS	10.7007	-0.110914
1	A1	23	IMRS	10.7043	-0.128024
1	A1	24	IMRS	10.6446	-0.208424
1	A1	25	IMRS	10.607	-0.266815
1	A1	26	IMRS	10.6372	-0.257308
1	A1	27	IMRS	10.6615	-0.253713
1	A1	28	IMRS	10.6888	-0.247183
1	A1	29	IMRS	10.7095	-0.247182
1	A1	30	IMRS	10.7009	-0.276583
1	A1	31	IMRS	10.657	-0.341212
1	A1	32	IMRS	10.6431	-0.375753
1	A1	33	IMRS	10.64	-0.399608
1	A1	34	IMRS	10.6997	-0.360671
1	A1	35	IMRS	10.7199	-0.36121
1	A1	36	IMRS	10.7318	-0.370001
1	A1	37	IMRS	10.7141	-0.408494
1	A1	38	IMRS	10.6391	-0.504161
1	A1	39	IMRS	10.6105	-0.553497
2	A2	1	IMRS	11.0762	0.0069169
2	A2	2	IMRS	11.0993	0.0185653
2	A2	3	IMRS	11.1113	0.0190348
2	A2	4	IMRS	11.1311	0.0273606
2	A2	5	IMRS	11.0861	-0.0291139
2	A2	6	IMRS	11.0739	-0.0528105
2	A2	7	IMRS	11.1372	-0.00107156
2	A2	8	IMRS	11.1757	0.0260188
2	A2	9	IMRS	11.1718	0.0105819
2	A2	10	IMRS	11.1913	0.018634
2	A2	11	IMRS	11.247	0.0628113
2	A2	12	IMRS	11.3162	0.120493
2	A2	13	IMRS	11.3861	0.178932
2	A2	14	IMRS	11.6143	0.395662
2	A2	15	IMRS	12.0332	0.803046
2	A2	16	IMRS	12.6819	1.44022
2	A2	17	IMRS	13.51	2.25689
2	A2	18	IMRS	14.3978	3.13312
2	A2	19	IMRS	15.2621	3.98593
2	A2	20	IMRS	16.1077	4.82009
2	A2	21	IMRS	16.853	5.55384
2	A2	22	IMRS	17.4921	6.18147
2	A2	23	IMRS	18.0834	6.76124
2	A2	24	IMRS	18.5824	7.24883
2	A2	25	IMRS	19.0857	7.74058
2	A2	26	IMRS	19.5766	8.22003
2	A2	27	IMRS	19.9831	8.61501
2	A2	28	IMRS	20.3177	8.93813
2	A2	29	IMRS	20.6406	9.24949
2	A2	30	IMRS	20.9826	9.58008
2	A2	31	IMRS	21.2877	9.87368
2	A2	32	IMRS	21.563	10.1374
2	A2	33	IMRS	21.7933	10.3562
2	A2	34	IMRS	21.9548	10.5062
2	A2	35	IMRS	22.1715	10.7114
2	A2	36	IMRS	22.419	10.9475
2	A2	37	IMRS	22.6041	11.1211
2	A2	38	IMRS	22.7291	11.2346
2	A2	39	IMRS	22.8443	11.3383
3	A3	1	IMRS	10.7111	-0.0540853
3	A3	2	IMRS	10.7087	-0.0320043
3	A3	3	IMRS	10.7043	-0.0119785
3	A3	4	IMRS	10.7063	0.0144389
3	A3	5	IMRS	10.6766	0.00929152
3	A3	6	IMRS	10.6316	-0.0113111
3	A3	7	IMRS	10.6153	-0.00311559
3	A3	8	IMRS	10.5966	0.00267474
3	A3	9	IMRS	10.6057	0.0361989
3	A3	10	IMRS	10.6423	0.0972909
3	A3	11	IMRS	10.7056	0.184995
3	A3	12	IMRS	10.7892	0.293037
3	A3	13	IMRS	10.8862	0.414582
3	A3	14	IMRS	11.131	0.683787
3	A3	15	IMRS	11.5883	1.16551
3	A3	16	IMRS	12.2382	1.83991
3	A3	17	IMRS	13.0081	2.63427
3	A3	18	IMRS	13.8424	3.49307
3	A3	19	IMRS	14.6226	4.29774
3	A3	20	IMRS	15.3045	5.00406
3	A3	21	IMRS	15.964	5.68807
3	A3	22	IMRS	16.5385	6.28701
3	A3	23	IMRS	17.1031	6.87602
3	A3	24	IMRS	17.6381	7.43551
3	A3	25	IMRS	18.1397	7.96158
3	A3	26	IMRS	18.5928	8.43917
3	A3	27	IMRS	19.0414	8.91215
3	A3	28	IMRS	19.4225	9.31777
3	A3	29	IMRS	19.7163	9.63597
3	A3	30	IMRS	20.022	9.96617
3	A3	31	IMRS	20.2641	10.2327
3	A3	32	IMRS	20.5071	10.5002
3	A3	33	IMRS	20.7955	10.813
3	A3	34	IMRS	21.0585	11.1005
3	A3	35	IMRS	21.2874	11.3539
3	A3	36	IMRS	21.4735	11.5645
3	A3	37	IMRS	21.6745	11.7899
3	A3	38	IMRS	21.8073	11.9472
3	A3	39	IMRS	21.9296	12.0939
4	A4	1
4	A4	2
4	A4	3
4	A4	4
4	A4	5
4	A4	6
4	A4	7
4	A4	8
4	A4	9
4	A4	10
4	A4	11
4	A4	12
4	A4	13
4	A4	14
4	A4	15
4	A4	16
4	A4	17
4	A4	18
4	A4	19
4	A4	20
4	A4	21
4	A4	22
4	A4	23
4	A4	24
4	A4	25
4	A4	26
4	A4	27
4	A4	28
4	A4	29
4	A4	30
4	A4	31
4	A4	32
4	A4	33
4	A4	34
4	A4	35
4	A4	36
4	A4	37
4	A4	38
4	A4	39
5	A5	1	IMRS	10.5439	-0.0164107
5	A5	2	IMRS	10.5357	-0.0254122
5	A5	3	IMRS	10.543	-0.0188591
5	A5	4	IMRS	10.5683	0.00561816
5	A5	5	IMRS	10.5826	0.0191101
5	A5	6	IMRS	10.566	0.00170585
5	A5	7	IMRS	10.5722	0.00705436
5	A5	8	IMRS	10.5526	-0.0133187
5	A5	9	IMRS	10.5681	0.00140541
5	A5	10	IMRS	10.5648	-0.00271606
5	A5	11	IMRS	10.557	-0.0113446
5	A5	12	IMRS	10.6089	0.0397793
5	A5	13	IMRS	10.6341	0.0641574
5	A5	14	IMRS	10.6582	0.0874589
5	A5	15	IMRS	10.7505	0.178944
5	A5	16	IMRS	10.9506	0.37817
5	A5	17	IMRS	11.2729	0.699668
5	A5	18	IMRS	11.7983	1.22428
5	A5	19	IMRS	12.5121	1.9373
5	A5	20	IMRS	13.3463	2.77072
5	A5	21	IMRS	14.1342	3.55774
5	A5	22	IMRS	14.8263	4.24907
5	A5	23	IMRS	15.4454	4.86738
5	A5	24	IMRS	16.0523	5.47349
5	A5	25	IMRS	16.6525	6.07287
5	A5	26	IMRS	17.1529	6.57239
5	A5	27	IMRS	17.6486	7.06728
5	A5	28	IMRS	18.0691	7.48702
5	A5	29	IMRS	18.3718	7.78887
5	A5	30	IMRS	18.7096	8.12589
5	A5	31	IMRS	19.0425	8.45802
5	A5	32	IMRS	19.3128	8.72746
5	A5	33	IMRS	19.6097	9.02353
5	A5	34	IMRS	19.9467	9.35973
5	A5	35	IMRS	20.2095	9.62173
5	A5	36	IMRS	20.4112	9.82262
5	A5	37	IMRS	20.5896	10.0002
5	A5	38	IMRS	20.7859	10.1957
5	A5	39	IMRS	20.9491	10.3581
6	A6	1	IMRS	10.9684	0.0620723
6	A6	2	IMRS	10.948	0.0310755
6	A6	3	IMRS	10.8953	-0.0322194
6	A6	4	IMRS	10.9367	-0.00142954
6	A6	5	IMRS	10.9699	0.0212007
6	A6	6	IMRS	10.9661	0.00683406
6	A6	7	IMRS	10.9798	0.00999503
6	A6	8	IMRS	10.9925	0.0120554
6	A6	9	IMRS	10.9924	0.00136238
6	A6	10	IMRS	11.0089	0.00726611
6	A6	11	IMRS	11.0074	-0.00481455
6	A6	12	IMRS	11.0025	-0.0202502
6	A6	13	IMRS	11.0211	-0.0123142
6	A6	14	IMRS	11.1141	0.0701095
6	A6	15	IMRS	11.2207	0.166128
6	A6	16	IMRS	11.3817	0.316583
6	A6	17	IMRS	11.714	0.638272
6	A6	18	IMRS	12.2699	1.18361
6	A6	19	IMRS	13.0173	1.92041
6	A6	20	IMRS	13.8653	2.75781
6	A6	21	IMRS	14.6819	3.56381
6	A6	22	IMRS	15.4093	4.28067
6	A6	23	IMRS	16.0416	4.90234
6	A6	24	IMRS	16.6597	5.50992
6	A6	25	IMRS	17.2272	6.06675
6	A6	26	IMRS	17.7477	6.57674
6	A6	27	IMRS	18.2532	7.07161
6	A6	28	IMRS	18.8442	7.65208
6	A6	29	IMRS	19.2389	8.03615
6	A6	30	IMRS	19.4487	8.23536
6	A6	31	IMRS	19.7045	8.48057
6	A6	32	IMRS	19.9885	8.754
6	A6	33	IMRS	20.2993	9.05424
6	A6	34	IMRS	20.6229	9.36722
6	A6	35	IMRS	20.8597	9.59347
6	A6	36	IMRS	21.0523	9.77541
6	A6	37	IMRS	21.2733	9.98585
6	A6	38	IMRS	21.4428	10.1448
6	A6	39	IMRS	21.5452	10.2366
7	A7	1	IMRS	11.0416	-0.00640265
7	A7	2	IMRS	11.029	-0.0228982
7	A7	3	IMRS	11.0594	0.00353209
7	A7	4	IMRS	11.0718	0.0119704
7	A7	5	IMRS	11.0421	-0.0216246
7	A7	6	IMRS	11.0583	-0.00935348
7	A7	7	IMRS	11.0749	0.00331529
7	A7	8	IMRS	11.0952	0.0196233
7	A7	9	IMRS	11.0793	-0.000202497
7	A7	10	IMRS	11.0762	-0.00726048
7	A7	11	IMRS	11.0948	0.00745106
7	A7	12	IMRS	11.1297	0.0384123
7	A7	13	IMRS	11.1714	0.0760892
7	A7	14	IMRS	11.2208	0.121582
7	A7	15	IMRS	11.3515	0.248373
7	A7	16	IMRS	11.5295	0.422386
7	A7	17	IMRS	11.8093	0.698236
7	A7	18	IMRS	12.3464	1.23141
7	A7	19	IMRS	13.0964	1.97743
7	A7	20	IMRS	13.9365	2.81366
7	A7	21	IMRS	14.7525	3.62571
7	A7	22	IMRS	15.4872	4.35649
7	A7	23	IMRS	16.1667	5.03204
7	A7	24	IMRS	16.7956	5.65698
7	A7	25	IMRS	17.355	6.21238
7	A7	26	IMRS	17.8905	6.74396
7	A7	27	IMRS	18.3814	7.2309
7	A7	28	IMRS	18.8057	7.65134
7	A7	29	IMRS	19.1831	8.02472
7	A7	30	IMRS	19.5476	8.38533
7	A7	31	IMRS	19.9016	8.73535
7	A7	32	IMRS	20.227	9.05685
7	A7	33	IMRS	20.5124	9.33824
7	A7	34	IMRS	20.7612	9.58314
7	A7	35	IMRS	20.9959	9.81388
7	A7	36	IMRS	21.24	10.0541
7	A7	37	IMRS	21.5207	10.3308
7	A7	38	IMRS	21.7359	10.5421
7	A7	39	IMRS	21.861	10.6633
8	A8	1
8	A8	2
8	A8	3
8	A8	4
8	A8	5
8	A8	6
8	A8	7
8	A8	8
8	A8	9
8	A8	10
8	A8	11
8	A8	12
8	A8	13
8	A8	14
8	A8	15
8	A8	16
8	A8	17
8	A8	18
8	A8	19
8	A8	20
8	A8	21
8	A8	22
8	A8	23
8	A8	24
8	A8	25
8	A8	26
8	A8	27
8	A8	28
8	A8	29
8	A8	30
8	A8	31
8	A8	32
8	A8	33
8	A8	34
8	A8	35
8	A8	36
8	A8	37
8	A8	38
8	A8	39
9	A9	1
9	A9	2
9	A9	3
9	A9	4
9	A9	5
9	A9	6
9	A9	7
9	A9	8
9	A9	9
9	A9	10
9	A9	11
9	A9	12
9	A9	13
9	A9	14
9	A9	15
9	A9	16
9	A9	17
9	A9	18
9	A9	19
9	A9	20
9	A9	21
9	A9	22
9	A9	23
9	A9	24
9	A9	25
9	A9	26
9	A9	27
9	A9	28
9	A9	29
9	A9	30
9	A9	31
9	A9	32
9	A9	33
9	A9	34
9	A9	35
9	A9	36
9	A9	37
9	A9	38
9	A9	39
10	A10	1
10	A10	2
10	A10	3
10	A10	4
10	A10	5
10	A10	6
10	A10	7
10	A10	8
10	A10	9
10	A10	10
10	A10	11
10	A10	12
10	A10	13
10	A10	14
10	A10	15
10	A10	16
10	A10	17
10	A10	18
10	A10	19
10	A10	20
10	A10	21
10	A10	22
10	A10	23
10	A10	24
10	A10	25
10	A10	26
10	A10	27
10	A10	28
10	A10	29
10	A10	30
10	A10	31
10	A10	32
10	A10	33
10	A10	34
10	A10	35
10	A10	36
10	A10	37
10	A10	38
10	A10	39
11	A11	1
11	A11	2
11	A11	3
11	A11	4
11	A11	5
11	A11	6
11	A11	7
11	A11	8
11	A11	9
11	A11	10
11	A11	11
11	A11	12
11	A11	13
11	A11	14
11	A11	15
11	A11	16
11	A11	17
11	A11	18
11	A11	19
11	A11	20
11	A11	21
11	A11	22
11	A11	23
11	A11	24
11	A11	25
11	A11	26
11	A11	27
11	A11	28
11	A11	29
11	A11	30
11	A11	31
11	A11	32
11	A11	33
11	A11	34
11	A11	35
11	A11	36
11	A11	37
11	A11	38
11	A11	39
12	A12	1
12	A12	2
12	A12	3
12	A12	4
12	A12	5
12	A12	6
12	A12	7
12	A12	8
12	A12	9
12	A12	10
12	A12	11
12	A12	12
12	A12	13
12	A12	14
12	A12	15
12	A12	16
12	A12	17
12	A12	18
12	A12	19
12	A12	20
12	A12	21
12	A12	22
12	A12	23
12	A12	24
12	A12	25
12	A12	26
12	A12	27
12	A12	28
12	A12	29
12	A12	30
12	A12	31
12	A12	32
12	A12	33
12	A12	34
12	A12	35
12	A12	36
12	A12	37
12	A12	38
12	A12	39
13	B1	1	IMRS	10.3899	-0.274679
13	B1	2	IMRS	10.4607	-0.199586
13	B1	3	IMRS	10.5558	-0.100209
13	B1	4	IMRS	10.6345	-0.0172639
13	B1	5	IMRS	10.6815	0.0339502
13	B1	6	IMRS	10.696	0.0527012
13	B1	7	IMRS	10.6537	0.0147162
13	B1	8	IMRS	10.7358	0.101031
13	B1	9	IMRS	10.7472	0.116647
13	B1	10	IMRS	10.6231	-0.00315234
13	B1	11	IMRS	10.5098	-0.112153
13	B1	12	IMRS	10.4691	-0.148663
13	B1	13	IMRS	10.5481	-0.0653543
13	B1	14	IMRS	10.6673	0.058113
13	B1	15	IMRS	10.6839	0.0789582
13	B1	16	IMRS	10.6188	0.0180746
13	B1	17	IMRS	10.5691	-0.0273968
13	B1	18	IMRS	10.5736	-0.0186441
13	B1	19	IMRS	10.6153	0.0273028
13	B1	20	IMRS	10.6506	0.0669011
13	B1	21	IMRS	10.7319	0.152393
13	B1	22	IMRS	10.7391	0.163862
13	B1	23	IMRS	10.6149	0.0439056
13	B1	24	IMRS	10.6253	0.0586235
13	B1	25	IMRS	10.6734	0.110961
13	B1	26	IMRS	10.7103	0.15216
13	B1	27	IMRS	10.7624	0.208501
13	B1	28	IMRS	10.8065	0.256847
13	B1	29	IMRS	10.8225	0.277085
13	B1	30	IMRS	10.8346	0.293463
13	B1	31	IMRS	10.8393	0.302335
13	B1	32	IMRS	10.8662	0.333516
13	B1	33	IMRS	10.9471	0.418655
13	B1	34	IMRS	10.9635	0.439383
13	B1	35	IMRS	10.9299	0.410023
13	B1	36	IMRS	10.9256	0.409992
13	B1	37	IMRS	10.8526	0.341207
13	B1	38	IMRS	10.8425	0.335319
13	B1	39	IMRS	10.8393	0.336443
14	B2	1	IMRS	11.227	-0.00183296
14	B2	2	IMRS	11.2301	-0.00430679
14	B2	3	IMRS	11.2475	0.00747395
14	B2	4	IMRS	11.2436	-0.00196648
14	B2	5	IMRS	11.2011	-0.0500431
14	B2	6	IMRS	11.2435	-0.0132599
14	B2	7	IMRS	11.2978	0.0355043
14	B2	8	IMRS	11.311	0.0431252
14	B2	9	IMRS	11.3028	0.0293036
14	B2	10	IMRS	11.2696	-0.00946808
14	B2	11	IMRS	11.244	-0.0406694
14	B2	12	IMRS	11.2595	-0.0307579
14	B2	13	IMRS	11.292	-0.00383091
14	B2	14	IMRS	11.3426	0.0412378
14	B2	15	IMRS	11.4038	0.0967903
14	B2	16	IMRS	11.4613	0.148743
14	B2	17	IMRS	11.697	0.378839
14	B2	18	IMRS	12.1223	0.798573
14	B2	19	IMRS	12.7691	1.43986
14	B2	20	IMRS	13.5863	2.25139
14	B2	21	IMRS	14.5095	3.16904
14	B2	22	IMRS	15.4196	4.0736
14	B2	23	IMRS	16.2728	4.92122
14	B2	24	IMRS	17.0338	5.67662
14	B2	25	IMRS	17.7194	6.35664
14	B2	26	IMRS	18.3427	6.9743
14	B2	27	IMRS	18.8799	7.50592
14	B2	28	IMRS	19.389	8.00947
14	B2	29	IMRS	19.8771	8.49198
14	B2	30	IMRS	20.3188	8.92815
14	B2	31	IMRS	20.6817	9.28541
14	B2	32	IMRS	21.0377	9.63587
14	B2	33	IMRS	21.3491	9.94166
14	B2	34	IMRS	21.6633	10.2503
14	B2	35	IMRS	21.9588	10.5402
14	B2	36	IMRS	22.2283	10.8041
14	B2	37	IMRS	22.5008	11.0711
14	B2	38	IMRS	22.7133	11.2779
14	B2	39	IMRS	22.8057	11.3648
15	B3	1	IMRS	10.8182	0.0200417
15	B3	2	IMRS	10.8227	0.0123767
15	B3	3	IMRS	10.8196	-0.00282041
15	B3	4	IMRS	10.8448	0.0101683
15	B3	5	IMRS	10.8502	0.00349708
15	B3	6	IMRS	10.8557	-0.00315415
15	B3	7	IMRS	10.8626	-0.00850075
15	B3	8	IMRS	10.89	0.00680733
15	B3	9	IMRS	10.8965	0.0011298
15	B3	10	IMRS	10.8819	-0.0256544
15	B3	11	IMRS	10.9206	0.000934644
15	B3	12	IMRS	10.9502	0.0183341
15	B3	13	IMRS	10.9432	-0.000741568
15	B3	14	IMRS	10.9844	0.0282155
15	B3	15	IMRS	11.0421	0.0738027
15	B3	16	IMRS	11.1552	0.1748
15	B3	17	IMRS	11.3421	0.349471
15	B3	18	IMRS	11.6962	0.691485
15	B3	19	IMRS	12.2351	1.21824
15	B3	20	IMRS	13.0096	1.98057
15	B3	21	IMRS	13.8809	2.83964
15	B3	22	IMRS	14.7436	3.69023
15	B3	23	IMRS	15.5518	4.48626
15	B3	24	IMRS	16.3212	5.24347
15	B3	25	IMRS	17.0551	5.96525
15	B3	26	IMRS	17.6641	6.56206
15	B3	27	IMRS	18.133	7.01889
15	B3	28	IMRS	18.6196	7.49331
15	B3	29	IMRS	19.0549	7.91641
15	B3	30	IMRS	19.4862	8.33556
15	B3	31	IMRS	19.8946	8.7318
15	B3	32	IMRS	20.3821	9.20718
15	B3	33	IMRS	20.7284	9.54128
15	B3	34	IMRS	20.9402	9.74101
15	B3	35	IMRS	21.2082	9.99684
15	B3	36	IMRS	21.4597	10.2362
15	B3	37	IMRS	21.64	10.4043
15	B3	38	IMRS	21.8579	10.61
15	B3	39	IMRS	22.0057	10.7457
16	B4	1
16	B4	2
16	B4	3
16	B4	4
16	B4	5
16	B4	6
16	B4	7
16	B4	8
16	B4	9
16	B4	10
16	B4	11
16	B4	12
16	B4	13
16	B4	14
16	B4	15
16	B4	16
16	B4	17
16	B4	18
16	B4	19
16	B4	20
16	B4	21
16	B4	22
16	B4	23
16	B4	24
16	B4	25
16	B4	26
16	B4	27
16	B4	28
16	B4	29
16	B4	30
16	B4	31
16	B4	32
16	B4	33
16	B4	34
16	B4	35
16	B4	36
16	B4	37
16	B4	38
16	B4	39
17	B5	1	IMRS	11.7052	0.00307621
17	B5	2	IMRS	11.7173	0.0035077
17	B5	3	IMRS	11.7069	-0.0184626
17	B5	4	IMRS	11.7325	-0.00449181
17	B5	5	IMRS	11.7196	-0.0289817
17	B5	6	IMRS	11.77	0.00982467
17	B5	7	IMRS	11.7976	0.0258306
17	B5	8	IMRS	11.8072	0.0237826
17	B5	9	IMRS	11.8207	0.0257008
17	B5	10	IMRS	11.8156	0.00894711
17	B5	11	IMRS	11.821	0.00275534
17	B5	12	IMRS	11.8089	-0.0209182
17	B5	13	IMRS	11.8174	-0.0239867
17	B5	14	IMRS	11.8381	-0.0148892
17	B5	15	IMRS	11.8649	0.000283241
17	B5	16	IMRS	11.8999	0.0236611
17	B5	17	IMRS	11.907	0.0191678
17	B5	18	IMRS	11.9997	0.100265
17	B5	19	IMRS	12.1853	0.274215
17	B5	20	IMRS	12.4704	0.547697
17	B5	21	IMRS	13.0282	1.09389
17	B5	22	IMRS	13.7734	1.82756
17	B5	23	IMRS	14.619	2.66151
17	B5	24	IMRS	15.4871	3.51802
17	B5	25	IMRS	16.2937	4.31305
17	B5	26	IMRS	17.0276	5.03527
17	B5	27	IMRS	17.709	5.70506
17	B5	28	IMRS	18.2779	6.26239
17	B5	29	IMRS	18.6857	6.65854
17	B5	30	IMRS	19.188	7.14927
17	B5	31	IMRS	19.7256	7.67525
17	B5	32	IMRS	20.1907	8.12879
17	B5	33	IMRS	20.6031	8.52953
17	B5	34	IMRS	20.9873	8.9022
17	B5	35	IMRS	21.3585	9.2618
17	B5	36	IMRS	21.6666	9.55823
17	B5	37	IMRS	21.8722	9.75224
17	B5	38	IMRS	22.1374	10.0058
17	B5	39	IMRS	22.3806	10.2374
18	B6	1	IMRS	11.0655	-0.0354119
18	B6	2	IMRS	11.0633	-0.0412954
18	B6	3	IMRS	11.0933	-0.0148818
18	B6	4	IMRS	11.1338	0.0219812
18	B6	5	IMRS	11.1267	0.0112129
18	B6	6	IMRS	11.1053	-0.0137403
18	B6	7	IMRS	11.1233	0.000574008
18	B6	8	IMRS	11.1259	-0.000394301
18	B6	9	IMRS	11.1307	0.000788879
18	B6	10	IMRS	11.1078	-0.025778
18	B6	11	IMRS	11.1435	0.00624419
18	B6	12	IMRS	11.1585	0.0176841
18	B6	13	IMRS	11.1408	-0.00369089
18	B6	14	IMRS	11.147	-0.00105527
18	B6	15	IMRS	11.185	0.0332586
18	B6	16	IMRS	11.2056	0.0502384
18	B6	17	IMRS	11.2117	0.0527462
18	B6	18	IMRS	11.2955	0.132866
18	B6	19	IMRS	11.4859	0.319654
18	B6	20	IMRS	11.8105	0.640581
18	B6	21	IMRS	12.3576	1.18406
18	B6	22	IMRS	13.0606	1.88345
18	B6	23	IMRS	13.9139	2.73319
18	B6	24	IMRS	14.779	3.59461
18	B6	25	IMRS	15.5983	4.41026
18	B6	26	IMRS	16.3053	5.11371
18	B6	27	IMRS	16.8791	5.68382
18	B6	28	IMRS	17.4492	6.25031
18	B6	29	IMRS	17.9863	6.78379
18	B6	30	IMRS	18.543	7.33682
18	B6	31	IMRS	19.0078	7.79804
18	B6	32	IMRS	19.3717	8.15825
18	B6	33	IMRS	19.782	8.56499
18	B6	34	IMRS	20.1541	8.93343
18	B6	35	IMRS	20.4676	9.24335
18	B6	36	IMRS	20.8009	9.57299
18	B6	37	IMRS	21.0751	9.84354
18	B6	38	IMRS	21.2976	10.0624
18	B6	39	IMRS	21.4972	10.2584
19	B7	1	IMRS	10.3802	-0.0306059
19	B7	2	IMRS	10.3736	-0.0415649
19	B7	3	IMRS	10.3621	-0.0574324
19	B7	4	IMRS	10.4055	-0.0184016
19	B7	5	IMRS	10.4536	0.0253279
19	B7	6	IMRS	10.4494	0.0167846
19	B7	7	IMRS	10.4512	0.0141656
19	B7	8	IMRS	10.4751	0.0337013
19	B7	9	IMRS	10.4825	0.0367719
19	B7	10	IMRS	10.4423	-0.00778882
19	B7	11	IMRS	10.4517	-0.00278803
19	B7	12	IMRS	10.4652	0.0063212
19	B7	13	IMRS	10.4584	-0.00480559
19	B7	14	IMRS	10.4257	-0.0418561
19	B7	15	IMRS	10.4715	-0.000479308
19	B7	16	IMRS	10.5094	0.0330983
19	B7	17	IMRS	10.5469	0.0662468
19	B7	18	IMRS	10.6254	0.140361
19	B7	19	IMRS	10.7973	0.307882
19	B7	20	IMRS	11.124	0.630255
19	B7	21	IMRS	11.665	1.16687
19	B7	22	IMRS	12.368	1.86553
19	B7	23	IMRS	13.1181	2.61128
19	B7	24	IMRS	13.8746	3.36335
19	B7	25	IMRS	14.5904	4.07478
19	B7	26	IMRS	15.232	4.71201
19	B7	27	IMRS	15.8062	5.28183
19	B7	28	IMRS	16.3612	5.83256
19	B7	29	IMRS	16.8851	6.35202
19	B7	30	IMRS	17.3605	6.82307
19	B7	31	IMRS	17.8527	7.31094
19	B7	32	IMRS	18.2558	7.70965
19	B7	33	IMRS	18.6152	8.06473
19	B7	34	IMRS	18.9362	8.38129
19	B7	35	IMRS	19.2429	8.68361
19	B7	36	IMRS	19.4891	8.92546
19	B7	37	IMRS	19.6691	9.10111
19	B7	38	IMRS	19.8874	9.31509
19	B7	39	IMRS	20.078	9.50128
20	B8	1
20	B8	2
20	B8	3
20	B8	4
20	B8	5
20	B8	6
20	B8	7
20	B8	8
20	B8	9
20	B8	10
20	B8	11
20	B8	12
20	B8	13
20	B8	14
20	B8	15
20	B8	16
20	B8	17
20	B8	18
20	B8	19
20	B8	20
20	B8	21
20	B8	22
20	B8	23
20	B8	24
20	B8	25
20	B8	26
20	B8	27
20	B8	28
20	B8	29
20	B8	30
20	B8	31
20	B8	32
20	B8	33
20	B8	34
20	B8	35
20	B8	36
20	B8	37
20	B8	38
20	B8	39
21	B9	1
21	B9	2
21	B9	3
21	B9	4
21	B9	5
21	B9	6
21	B9	7
21	B9	8
21	B9	9
21	B9	10
21	B9	11
21	B9	12
21	B9	13
21	B9	14
21	B9	15
21	B9	16
21	B9	17
21	B9	18
21	B9	19
21	B9	20
21	B9	21
21	B9	22
21	B9	23
21	B9	24
21	B9	25
21	B9	26
21	B9	27
21	B9	28
21	B9	29
21	B9	30
21	B9	31
21	B9	32
21	B9	33
21	B9	34
21	B9	35
21	B9	36
21	B9	37
21	B9	38
21	B9	39
22	B10	1
22	B10	2
22	B10	3
22	B10	4
22	B10	5
22	B10	6
22	B10	7
22	B10	8
22	B10	9
22	B10	10
22	B10	11
22	B10	12
22	B10	13
22	B10	14
22	B10	15
22	B10	16
22	B10	17
22	B10	18
22	B10	19
22	B10	20
22	B10	21
22	B10	22
22	B10	23
22	B10	24
22	B10	25
22	B10	26
22	B10	27
22	B10	28
22	B10	29
22	B10	30
22	B10	31
22	B10	32
22	B10	33
22	B10	34
22	B10	35
22	B10	36
22	B10	37
22	B10	38
22	B10	39
23	B11	1
23	B11	2
23	B11	3
23	B11	4
23	B11	5
23	B11	6
23	B11	7
23	B11	8
23	B11	9
23	B11	10
23	B11	11
23	B11	12
23	B11	13
23	B11	14
23	B11	15
23	B11	16
23	B11	17
23	B11	18
23	B11	19
23	B11	20
23	B11	21
23	B11	22
23	B11	23
23	B11	24
23	B11	25
23	B11	26
23	B11	27
23	B11	28
23	B11	29
23	B11	30
23	B11	31
23	B11	32
23	B11	33
23	B11	34
23	B11	35
23	B11	36
23	B11	37
23	B11	38
23	B11	39
24	B12	1
24	B12	2
24	B12	3
24	B12	4
24	B12	5
24	B12	6
24	B12	7
24	B12	8
24	B12	9
24	B12	10
24	B12	11
24	B12	12
24	B12	13
24	B12	14
24	B12	15
24	B12	16
24	B12	17
24	B12	18
24	B12	19
24	B12	20
24	B12	21
24	B12	22
24	B12	23
24	B12	24
24	B12	25
24	B12	26
24	B12	27
24	B12	28
24	B12	29
24	B12	30
24	B12	31
24	B12	32
24	B12	33
24	B12	34
24	B12	35
24	B12	36
24	B12	37
24	B12	38
24	B12	39
25	C1	1	IMRS	12.9755	-0.203008
25	C1	2	IMRS	13.3174	0.165665
25	C1	3	IMRS	13.4758	0.350973
25	C1	4	IMRS	13.0477	-0.0502554
25	C1	5	IMRS	12.8433	-0.227843
25	C1	6	IMRS	13.0265	-0.0178366
25	C1	7	IMRS	13.0779	0.060448
25	C1	8	IMRS	12.9125	-0.0781206
25	C1	9	IMRS	12.948	-0.0157005
25	C1	10	IMRS	12.6761	-0.260801
25	C1	11	IMRS	12.7779	-0.132144
25	C1	12	IMRS	12.9757	0.0924918
25	C1	13	IMRS	13.0526	0.196241
25	C1	14	IMRS	12.9297	0.100171
25	C1	15	IMRS	12.785	-0.0176253
25	C1	16	IMRS	12.6715	-0.104323
25	C1	17	IMRS	13.1156	0.366611
25	C1	18	IMRS	13.3681	0.646046
25	C1	19	IMRS	13.1151	0.419828
25	C1	20	IMRS	13.5456	0.877248
25	C1	21	IMRS	13.7843	1.14275
25	C1	22	IMRS	13.853	1.23835
25	C1	23	IMRS	14.561	1.97316
25	C1	24	IMRS	15.6629	3.10195
25	C1	25	IMRS	16.5969	4.06272
25	C1	26	IMRS	16.9474	4.4401
25	C1	27	IMRS	17.2993	4.81892
25	C1	28	IMRS	18.0672	5.61358
25	C1	29	IMRS	18.8835	6.45673
25	C1	30	IMRS	19.6392	7.23934
25	C1	31	IMRS	20.34	7.96696
25	C1	32	IMRS	21.0789	8.7327
25	C1	33	IMRS	21.5774	9.25809
25	C1	34	IMRS	22.1087	9.8162
25	C1	35	IMRS	22.2302	9.96461
25	C1	36	IMRS	22.5055	10.2668
25	C1	37	IMRS	23.1684	10.9564
25	C1	38	IMRS	23.733	11.5479
25	C1	39	IMRS	23.5314	11.3732
26	C2	1	IMRS	11.0901	-0.00542651
26	C2	2	IMRS	11.1053	0.00706812
26	C2	3	IMRS	11.1253	0.0242968
26	C2	4	IMRS	11.0889	-0.0148663
26	C2	5	IMRS	11.1075	0.000998665
26	C2	6	IMRS	11.1231	0.0138748
26	C2	7	IMRS	11.1024	-0.00959461
26	C2	8	IMRS	11.1149	7.42818e-05
26	C2	9	IMRS	11.1105	-0.00704435
26	C2	10	IMRS	11.1033	-0.0170097
26	C2	11	IMRS	11.086	-0.0370935
26	C2	12	IMRS	11.1242	-0.00164301
26	C2	13	IMRS	11.1625	0.0339534
26	C2	14	IMRS	11.1574	0.0260556
26	C2	15	IMRS	11.1221	-0.0120021
26	C2	16	IMRS	11.12	-0.0168548
26	C2	17	IMRS	11.1913	0.0517111
26	C2	18	IMRS	11.2556	0.113197
26	C2	19	IMRS	11.3634	0.218236
26	C2	20	IMRS	11.551	0.403108
26	C2	21	IMRS	11.8797	0.729027
26	C2	22	IMRS	12.4649	1.31151
26	C2	23	IMRS	13.2672	2.11107
26	C2	24	IMRS	14.1196	2.96064
26	C2	25	IMRS	15.0219	3.86025
26	C2	26	IMRS	15.886	4.72153
26	C2	27	IMRS	16.6883	5.52114
26	C2	28	IMRS	17.4874	6.31742
26	C2	29	IMRS	18.1281	6.95537
26	C2	30	IMRS	18.6608	7.48537
26	C2	31	IMRS	19.1647	7.9865
26	C2	32	IMRS	19.6052	8.4242
26	C2	33	IMRS	20.0529	8.86913
26	C2	34	IMRS	20.4441	9.25762
26	C2	35	IMRS	20.8725	9.68321
26	C2	36	IMRS	21.2269	10.0348
26	C2	37	IMRS	21.5235	10.3287
26	C2	38	IMRS	21.8065	10.6089
26	C2	39	IMRS	22.0496	10.8493
27	C3	1	IMRS	11.3325	-0.0120018
27	C3	2	IMRS	11.3611	0.0117234
27	C3	3	IMRS	11.3629	0.0086264
27	C3	4	IMRS	11.3597	0.000448258
27	C3	5	IMRS	11.3853	0.0211769
27	C3	6	IMRS	11.4083	0.0392258
27	C3	7	IMRS	11.3606	-0.0134374
27	C3	8	IMRS	11.3575	-0.021401
27	C3	9	IMRS	11.3569	-0.026948
27	C3	10	IMRS	11.3359	-0.0528883
27	C3	11	IMRS	11.358	-0.0357302
27	C3	12	IMRS	11.4235	0.0248287
27	C3	13	IMRS	11.4387	0.0351738
27	C3	14	IMRS	11.4167	0.00827405
27	C3	15	IMRS	11.426	0.012651
27	C3	16	IMRS	11.4096	-0.00871739
27	C3	17	IMRS	11.4421	0.0189044
27	C3	18	IMRS	11.5047	0.0765432
27	C3	19	IMRS	11.6278	0.194703
27	C3	20	IMRS	11.8034	0.365392
27	C3	21	IMRS	12.1572	0.714237
27	C3	22	IMRS	12.7178	1.26994
27	C3	23	IMRS	13.4945	2.04169
27	C3	24	IMRS	14.4327	2.975
27	C3	25	IMRS	15.3825	3.91989
27	C3	26	IMRS	16.2733	4.8057
27	C3	27	IMRS	17.077	5.60456
27	C3	28	IMRS	17.7987	6.32127
27	C3	29	IMRS	18.4353	6.95301
27	C3	30	IMRS	18.9318	7.44451
27	C3	31	IMRS	19.4793	7.98716
27	C3	32	IMRS	20.0067	8.50958
27	C3	33	IMRS	20.5072	9.00512
27	C3	34	IMRS	21.0193	9.51234
27	C3	35	IMRS	21.4076	9.89571
27	C3	36	IMRS	21.7174	10.2006
27	C3	37	IMRS	22.0277	10.506
27	C3	38	IMRS	22.2859	10.7593
27	C3	39	IMRS	22.5128	10.9813
28	C4	1
28	C4	2
28	C4	3
28	C4	4
28	C4	5
28	C4	6
28	C4	7
28	C4	8
28	C4	9
28	C4	10
28	C4	11
28	C4	12
28	C4	13
28	C4	14
28	C4	15
28	C4	16
28	C4	17
28	C4	18
28	C4	19
28	C4	20
28	C4	21
28	C4	22
28	C4	23
28	C4	24
28	C4	25
28	C4	26
28	C4	27
28	C4	28
28	C4	29
28	C4	30
28	C4	31
28	C4	32
28	C4	33
28	C4	34
28	C4	35
28	C4	36
28	C4	37
28	C4	38
28	C4	39
29	C5	1	IMRS	10.8201	0.0160488
29	C5	2	IMRS	10.8352	0.0219726
29	C5	3	IMRS	10.8616	0.0393186
29	C5	4	IMRS	10.8388	0.00741583
29	C5	5	IMRS	10.8565	0.0160319
29	C5	6	IMRS	10.867	0.0174839
29	C5	7	IMRS	10.8444	-0.0142253
29	C5	8	IMRS	10.8333	-0.034455
29	C5	9	IMRS	10.844	-0.0328495
29	C5	10	IMRS	10.8477	-0.0382133
29	C5	11	IMRS	10.8591	-0.0359288
29	C5	12	IMRS	10.892	-0.0120702
29	C5	13	IMRS	10.9273	0.0140887
29	C5	14	IMRS	10.955	0.0327317
29	C5	15	IMRS	10.9639	0.0324633
29	C5	16	IMRS	10.948	0.00751375
29	C5	17	IMRS	10.9503	0.000694561
29	C5	18	IMRS	10.9481	-0.0105678
29	C5	19	IMRS	10.981	0.0132269
29	C5	20	IMRS	11.0298	0.0529012
29	C5	21	IMRS	11.0809	0.0949655
29	C5	22	IMRS	11.2259	0.230832
29	C5	23	IMRS	11.4952	0.491055
29	C5	24	IMRS	11.957	0.943793
29	C5	25	IMRS	12.6351	1.61276
29	C5	26	IMRS	13.4524	2.42095
29	C5	27	IMRS	14.3556	3.31513
29	C5	28	IMRS	15.1406	4.09102
29	C5	29	IMRS	15.8312	4.77248
29	C5	30	IMRS	16.5258	5.45804
29	C5	31	IMRS	17.1227	6.04582
29	C5	32	IMRS	17.6123	6.52634
29	C5	33	IMRS	18.1001	7.00507
29	C5	34	IMRS	18.6183	7.51419
29	C5	35	IMRS	19.0552	7.94198
29	C5	36	IMRS	19.4514	8.32905
29	C5	37	IMRS	19.7879	8.65643
29	C5	38	IMRS	20.081	8.94046
29	C5	39	IMRS	20.2878	9.1382
30	C6	1	IMRS	10.9259	-0.0277965
30	C6	2	IMRS	10.9247	-0.0366084
30	C6	3	IMRS	10.9482	-0.0206801
30	C6	4	IMRS	10.9798	0.00327726
30	C6	5	IMRS	10.9499	-0.0342145
30	C6	6	IMRS	10.9612	-0.0305437
30	C6	7	IMRS	10.9835	-0.0157894
30	C6	8	IMRS	11.0122	0.00532125
30	C6	9	IMRS	11.0584	0.0439318
30	C6	10	IMRS	11.0834	0.0613545
30	C6	11	IMRS	11.0604	0.0307388
30	C6	12	IMRS	11.0642	0.0269079
30	C6	13	IMRS	11.0718	0.0268985
30	C6	14	IMRS	11.036	-0.0164679
30	C6	15	IMRS	11.0409	-0.0190943
30	C6	16	IMRS	11.0512	-0.0164363
30	C6	17	IMRS	11.03	-0.0452038
30	C6	18	IMRS	11.0453	-0.0375524
30	C6	19	IMRS	11.0694	-0.0210071
30	C6	20	IMRS	11.1194	0.0213962
30	C6	21	IMRS	11.1912	0.0856072
30	C6	22	IMRS	11.2993	0.186099
30	C6	23	IMRS	11.5428	0.422051
30	C6	24	IMRS	12.0012	0.872808
30	C6	25	IMRS	12.6789	1.54293
30	C6	26	IMRS	13.4826	2.33902
30	C6	27	IMRS	14.3458	3.1946
30	C6	28	IMRS	15.1854	4.02665
30	C6	29	IMRS	15.9112	4.7448
30	C6	30	IMRS	16.5403	5.36638
30	C6	31	IMRS	17.1285	5.94692
30	C6	32	IMRS	17.7158	6.52668
30	C6	33	IMRS	18.2933	7.09652
30	C6	34	IMRS	18.7487	7.54439
30	C6	35	IMRS	19.1458	7.93384
30	C6	36	IMRS	19.6125	8.39299
30	C6	37	IMRS	19.9595	8.73236
30	C6	38	IMRS	20.2209	8.98621
30	C6	39	IMRS	20.4565	9.21419
31	C7	1	IMRS	11.1729	-0.00639051
31	C7	2	IMRS	11.1863	-0.000948858
31	C7	3	IMRS	11.2121	0.016778
31	C7	4	IMRS	11.2082	0.00487616
31	C7	5	IMRS	11.1776	-0.0337238
31	C7	6	IMRS	11.1993	-0.0199881
31	C7	7	IMRS	11.2199	-0.00741197
31	C7	8	IMRS	11.2516	0.0161972
31	C7	9	IMRS	11.2687	0.0253543
31	C7	10	IMRS	11.2764	0.0249795
31	C7	11	IMRS	11.2491	-0.0103331
31	C7	12	IMRS	11.2504	-0.0170022
31	C7	13	IMRS	11.2455	-0.0299674
31	C7	14	IMRS	11.2991	0.015684
31	C7	15	IMRS	11.3216	0.0301884
31	C7	16	IMRS	11.3084	0.00897776
31	C7	17	IMRS	11.3103	0.00278936
31	C7	18	IMRS	11.2881	-0.0273983
31	C7	19	IMRS	11.3157	-0.00777929
31	C7	20	IMRS	11.4376	0.106049
31	C7	21	IMRS	11.5233	0.183807
31	C7	22	IMRS	11.5875	0.239972
31	C7	23	IMRS	11.8113	0.455749
31	C7	24	IMRS	12.2798	0.916251
31	C7	25	IMRS	12.971	1.59937
31	C7	26	IMRS	13.836	2.45641
31	C7	27	IMRS	14.6911	3.30345
31	C7	28	IMRS	15.4424	4.04679
31	C7	29	IMRS	16.167	4.76335
31	C7	30	IMRS	16.8586	5.44696
31	C7	31	IMRS	17.4753	6.05568
31	C7	32	IMRS	18.0108	6.58313
31	C7	33	IMRS	18.5479	7.11222
31	C7	34	IMRS	19.0382	7.59453
31	C7	35	IMRS	19.4555	8.00377
31	C7	36	IMRS	19.8042	8.3445
31	C7	37	IMRS	20.2014	8.73366
31	C7	38	IMRS	20.6394	9.16361
31	C7	39	IMRS	20.9156	9.43186
32	C8	1
32	C8	2
32	C8	3
32	C8	4
32	C8	5
32	C8	6
32	C8	7
32	C8	8
32	C8	9
32	C8	10
32	C8	11
32	C8	12
32	C8	13
32	C8	14
32	C8	15
32	C8	16
32	C8	17
32	C8	18
32	C8	19
32	C8	20
32	C8	21
32	C8	22
32	C8	23
32	C8	24
32	C8	25
32	C8	26
32	C8	27
32	C8	28
32	C8	29
32	C8	30
32	C8	31
32	C8	32
32	C8	33
32	C8	34
32	C8	35
32	C8	36
32	C8	37
32	C8	38
32	C8	39
33	C9	1
33	C9	2
33	C9	3
33	C9	4
33	C9	5
33	C9	6
33	C9	7
33	C9	8
33	C9	9
33	C9	10
33	C9	11
33	C9	12
33	C9	13
33	C9	14
33	C9	15
33	C9	16
33	C9	17
33	C9	18
33	C9	19
33	C9	20
33	C9	21
33	C9	22
33	C9	23
33	C9	24
33	C9	25
33	C9	26
33	C9	27
33	C9	28
33	C9	29
33	C9	30
33	C9	31
33	C9	32
33	C9	33
33	C9	34
33	C9	35
33	C9	36
33	C9	37
33	C9	38
33	C9	39
34	C10	1
34	C10	2
34	C10	3
34	C10	4
34	C10	5
34	C10	6
34	C10	7
34	C10	8
34	C10	9
34	C10	10
34	C10	11
34	C10	12
34	C10	13
34	C10	14
34	C10	15
34	C10	16
34	C10	17
34	C10	18
34	C10	19
34	C10	20
34	C10	21
34	C10	22
34	C10	23
34	C10	24
34	C10	25
34	C10	26
34	C10	27
34	C10	28
34	C10	29
34	C10	30
34	C10	31
34	C10	32
34	C10	33
34	C10	34
34	C10	35
34	C10	36
34	C10	37
34	C10	38
34	C10	39
35	C11	1
35	C11	2
35	C11	3
35	C11	4
35	C11	5
35	C11	6
35	C11	7
35	C11	8
35	C11	9
35	C11	10
35	C11	11
35	C11	12
35	C11	13
35	C11	14
35	C11	15
35	C11	16
35	C11	17
35	C11	18
35	C11	19
35	C11	20
35	C11	21
35	C11	22
35	C11	23
35	C11	24
35	C11	25
35	C11	26
35	C11	27
35	C11	28
35	C11	29
35	C11	30
35	C11	31
35	C11	32
35	C11	33
35	C11	34
35	C11	35
35	C11	36
35	C11	37
35	C11	38
35	C11	39
36	C12	1
36	C12	2
36	C12	3
36	C12	4
36	C12	5
36	C12	6
36	C12	7
36	C12	8
36	C12	9
36	C12	10
36	C12	11
36	C12	12
36	C12	13
36	C12	14
36	C12	15
36	C12	16
36	C12	17
36	C12	18
36	C12	19
36	C12	20
36	C12	21
36	C12	22
36	C12	23
36	C12	24
36	C12	25
36	C12	26
36	C12	27
36	C12	28
36	C12	29
36	C12	30
36	C12	31
36	C12	32
36	C12	33
36	C12	34
36	C12	35
36	C12	36
36	C12	37
36	C12	38
36	C12	39
37	D1	1	IMRS	11.2304	0.0751212
37	D1	2	IMRS	11.2186	0.0548862
37	D1	3	IMRS	11.2108	0.038646
37	D1	4	IMRS	11.2241	0.0434878
37	D1	5	IMRS	11.2212	0.0320742
37	D1	6	IMRS	11.1652	-0.0323303
37	D1	7	IMRS	11.1353	-0.0706747
37	D1	8	IMRS	11.1605	-0.0539387
37	D1	9	IMRS	11.1405	-0.0824516
37	D1	10	IMRS	11.2072	-0.0242212
37	D1	11	IMRS	11.2509	0.0110561
37	D1	12	IMRS	11.3156	0.0672847
37	D1	13	IMRS	11.344	0.0871908
37	D1	14	IMRS	11.3156	0.0503866
37	D1	15	IMRS	11.2346	-0.0390757
37	D1	16	IMRS	11.2905	0.00839912
37	D1	17	IMRS	11.3075	0.0169488
37	D1	18	IMRS	11.2463	-0.052782
37	D1	19	IMRS	11.2799	-0.0275726
37	D1	20	IMRS	11.3429	0.0269204
37	D1	21	IMRS	11.3624	0.0379525
37	D1	22	IMRS	11.4212	0.0882798
37	D1	23	IMRS	11.5144	0.173072
37	D1	24	IMRS	11.7995	0.44969
37	D1	25	IMRS	12.278	0.91977
37	D1	26	IMRS	12.9332	1.56648
37	D1	27	IMRS	13.7786	2.40348
37	D1	28	IMRS	14.6706	3.28698
37	D1	29	IMRS	15.5319	4.13978
37	D1	30	IMRS	16.3	4.89942
37	D1	31	IMRS	17.1196	5.71064
37	D1	32	IMRS	17.8008	6.3833
37	D1	33	IMRS	18.4415	7.01562
37	D1	34	IMRS	19.0457	7.61136
37	D1	35	IMRS	19.5286	8.0858
37	D1	36	IMRS	19.9333	8.48206
37	D1	37	IMRS	20.4597	8.99998
37	D1	38	IMRS	20.8591	9.39091
37	D1	39	IMRS	21.0149	9.53822
38	D2	1	IMRS	11.3887	0.0142825
38	D2	2	IMRS	11.3778	-0.00377879
38	D2	3	IMRS	11.3902	0.00147728
38	D2	4	IMRS	11.4068	0.0109457
38	D2	5	IMRS	11.3934	-0.00957887
38	D2	6	IMRS	11.3893	-0.020768
38	D2	7	IMRS	11.4052	-0.0120882
38	D2	8	IMRS	11.4256	0.00119209
38	D2	9	IMRS	11.4373	0.00580539
38	D2	10	IMRS	11.4483	0.00970629
38	D2	11	IMRS	11.4619	0.0161421
38	D2	12	IMRS	11.4441	-0.00877708
38	D2	13	IMRS	11.4606	0.000548325
38	D2	14	IMRS	11.4879	0.0207819
38	D2	15	IMRS	11.4995	0.0252559
38	D2	16	IMRS	11.4695	-0.0118645
38	D2	17	IMRS	11.4756	-0.0129027
38	D2	18	IMRS	11.4839	-0.0117207
38	D2	19	IMRS	11.4986	-0.00415486
38	D2	20	IMRS	11.5008	-0.00912885
38	D2	21	IMRS	11.5461	0.0290357
38	D2	22	IMRS	11.6454	0.121178
38	D2	23	IMRS	11.7723	0.241035
38	D2	24	IMRS	11.9904	0.451926
38	D2	25	IMRS	12.4549	0.909338
38	D2	26	IMRS	13.1744	1.62173
38	D2	27	IMRS	14.0491	2.48932
38	D2	28	IMRS	14.9252	3.35823
38	D2	29	IMRS	15.804	4.22996
38	D2	30	IMRS	16.6298	5.04859
38	D2	31	IMRS	17.3524	5.7641
38	D2	32	IMRS	17.9985	6.40299
38	D2	33	IMRS	18.6075	7.00495
38	D2	34	IMRS	19.2097	7.60002
38	D2	35	IMRS	19.744	8.12716
38	D2	36	IMRS	20.241	8.617
38	D2	37	IMRS	20.7172	9.08613
38	D2	38	IMRS	21.1408	9.50253
38	D2	39	IMRS	21.4593	9.8139
39	D3	1	IMRS	11.2313	0.00327142
39	D3	2	IMRS	11.2354	0.00190993
39	D3	3	IMRS	11.2269	-0.0121412
39	D3	4	IMRS	11.2355	-0.00904899
39	D3	5	IMRS	11.2484	-0.00162237
39	D3	6	IMRS	11.2664	0.0107796
39	D3	7	IMRS	11.2723	0.0111871
39	D3	8	IMRS	11.2574	-0.00916201
39	D3	9	IMRS	11.2841	0.0119384
39	D3	10	IMRS	11.294	0.0163323
39	D3	11	IMRS	11.3029	0.0197678
39	D3	12	IMRS	11.29	0.00129264
39	D3	13	IMRS	11.2827	-0.0114643
39	D3	14	IMRS	11.2832	-0.0164784
39	D3	15	IMRS	11.2878	-0.0173907
39	D3	16	IMRS	11.2858	-0.0248767
39	D3	17	IMRS	11.3256	0.00933294
39	D3	18	IMRS	11.344	0.022247
39	D3	19	IMRS	11.3266	-0.000693284
39	D3	20	IMRS	11.3216	-0.0111652
39	D3	21	IMRS	11.3962	0.0578773
39	D3	22	IMRS	11.4839	0.140087
39	D3	23	IMRS	11.6053	0.255974
39	D3	24	IMRS	11.8473	0.492452
39	D3	25	IMRS	12.3254	0.96509
39	D3	26	IMRS	13.0156	1.64974
39	D3	27	IMRS	13.8833	2.51198
39	D3	28	IMRS	14.8122	3.43532
39	D3	29	IMRS	15.6668	4.28436
39	D3	30	IMRS	16.4884	5.10045
39	D3	31	IMRS	17.2431	5.84965
39	D3	32	IMRS	17.9166	6.51766
39	D3	33	IMRS	18.536	7.1315
39	D3	34	IMRS	19.0963	7.68631
39	D3	35	IMRS	19.6073	8.1918
39	D3	36	IMRS	20.1138	8.69279
39	D3	37	IMRS	20.5272	9.10066
39	D3	38	IMRS	20.9191	9.48705
39	D3	39	IMRS	21.2292	9.79165
40	D4	1
40	D4	2
40	D4	3
40	D4	4
40	D4	5
40	D4	6
40	D4	7
40	D4	8
40	D4	9
40	D4	10
40	D4	11
40	D4	12
40	D4	13
40	D4	14
40	D4	15
40	D4	16
40	D4	17
40	D4	18
40	D4	19
40	D4	20
40	D4	21
40	D4	22
40	D4	23
40	D4	24
40	D4	25
40	D4	26
40	D4	27
40	D4	28
40	D4	29
40	D4	30
40	D4	31
40	D4	32
40	D4	33
40	D4	34
40	D4	35
40	D4	36
40	D4	37
40	D4	38
40	D4	39
41	D5	1	IMRS	11.0078	0.00361801
41	D5	2	IMRS	11.026	0.0138489
41	D5	3	IMRS	11.0245	0.00447033
41	D5	4	IMRS	11.0225	-0.00552621
41	D5	5	IMRS	11.0416	0.00564977
41	D5	6	IMRS	11.0092	-0.0347089
41	D5	7	IMRS	11.0169	-0.0349942
41	D5	8	IMRS	11.0544	-0.0054943
41	D5	9	IMRS	11.1009	0.0330655
41	D5	10	IMRS	11.1185	0.0426765
41	D5	11	IMRS	11.1106	0.0268616
41	D5	12	IMRS	11.1048	0.0130284
41	D5	13	IMRS	11.1236	0.0239517
41	D5	14	IMRS	11.1167	0.0090971
41	D5	15	IMRS	11.0931	-0.0225421
41	D5	16	IMRS	11.1013	-0.0222781
41	D5	17	IMRS	11.1114	-0.0200924
41	D5	18	IMRS	11.0907	-0.0487724
41	D5	19	IMRS	11.1374	-0.0100734
41	D5	20	IMRS	11.1681	0.0127222
41	D5	21	IMRS	11.1748	0.0113831
41	D5	22	IMRS	11.1929	0.0215758
41	D5	23	IMRS	11.1905	0.0111673
41	D5	24	IMRS	11.2463	0.0590168
41	D5	25	IMRS	11.3686	0.173358
41	D5	26	IMRS	11.5822	0.378983
41	D5	27	IMRS	11.9471	0.735914
41	D5	28	IMRS	12.5551	1.33597
41	D5	29	IMRS	13.3582	2.13114
41	D5	30	IMRS	14.202	2.96695
41	D5	31	IMRS	15.0153	3.77235
41	D5	32	IMRS	15.789	4.53801
41	D5	33	IMRS	16.5017	5.24282
41	D5	34	IMRS	17.216	5.94913
41	D5	35	IMRS	17.8076	6.5328
41	D5	36	IMRS	18.3445	7.06173
41	D5	37	IMRS	18.8175	7.52674
41	D5	38	IMRS	19.2021	7.90339
41	D5	39	IMRS	19.5328	8.22611
42	D6	1	IMRS	11.1726	0.0201451
42	D6	2	IMRS	11.1737	0.0152885
42	D6	3	IMRS	11.1276	-0.0368351
42	D6	4	IMRS	11.1299	-0.0404996
42	D6	5	IMRS	11.1737	-0.00259446
42	D6	6	IMRS	11.1879	0.00553701
42	D6	7	IMRS	11.1782	-0.0100771
42	D6	8	IMRS	11.2104	0.0161618
42	D6	9	IMRS	11.2348	0.034593
42	D6	10	IMRS	11.2489	0.0427101
42	D6	11	IMRS	11.2483	0.036155
42	D6	12	IMRS	11.2198	0.00170112
42	D6	13	IMRS	11.2277	0.0035927
42	D6	14	IMRS	11.2326	0.00251168
42	D6	15	IMRS	11.2398	0.00375762
42	D6	16	IMRS	11.2492	0.00712167
42	D6	17	IMRS	11.2598	0.0118314
42	D6	18	IMRS	11.2327	-0.0212998
42	D6	19	IMRS	11.2056	-0.0543671
42	D6	20	IMRS	11.2141	-0.0518546
42	D6	21	IMRS	11.2451	-0.0267459
42	D6	22	IMRS	11.2619	-0.0159126
42	D6	23	IMRS	11.2887	0.00488839
42	D6	24	IMRS	11.3182	0.0283816
42	D6	25	IMRS	11.4371	0.141368
42	D6	26	IMRS	11.6324	0.330622
42	D6	27	IMRS	12.0224	0.714673
42	D6	28	IMRS	12.6541	1.34044
42	D6	29	IMRS	13.4885	2.16887
42	D6	30	IMRS	14.3583	3.03265
42	D6	31	IMRS	15.1776	3.84601
42	D6	32	IMRS	15.9274	4.58979
42	D6	33	IMRS	16.6451	5.30159
42	D6	34	IMRS	17.3175	5.96798
42	D6	35	IMRS	17.8981	6.54264
42	D6	36	IMRS	18.3942	7.03275
42	D6	37	IMRS	18.8929	7.52544
42	D6	38	IMRS	19.4029	8.0295
42	D6	39	IMRS	19.7517	8.3723
43	D7	1	IMRS	11.1718	-0.0384918
43	D7	2	IMRS	11.1601	-0.0550774
43	D7	3	IMRS	11.2047	-0.0153257
43	D7	4	IMRS	11.2476	0.0226599
43	D7	5	IMRS	11.205	-0.0248085
43	D7	6	IMRS	11.2065	-0.0282143
43	D7	7	IMRS	11.234	-0.00563727
43	D7	8	IMRS	11.2565	0.0120369
43	D7	9	IMRS	11.2472	-0.00222359
43	D7	10	IMRS	11.2724	0.0181715
43	D7	11	IMRS	11.2884	0.029272
43	D7	12	IMRS	11.2712	0.00714841
43	D7	13	IMRS	11.2833	0.0143866
43	D7	14	IMRS	11.292	0.018181
43	D7	15	IMRS	11.2936	0.0148181
43	D7	16	IMRS	11.2655	-0.0180972
43	D7	17	IMRS	11.2737	-0.0148006
43	D7	18	IMRS	11.2713	-0.0221432
43	D7	19	IMRS	11.2916	-0.00674828
43	D7	20	IMRS	11.3045	0.00132434
43	D7	21	IMRS	11.3079	-0.000170303
43	D7	22	IMRS	11.3341	0.0211288
43	D7	23	IMRS	11.3404	0.0225572
43	D7	24	IMRS	11.3677	0.0449187
43	D7	25	IMRS	11.4773	0.149682
43	D7	26	IMRS	11.6851	0.352498
43	D7	27	IMRS	12.0435	0.706049
43	D7	28	IMRS	12.6665	1.32412
43	D7	29	IMRS	13.496	2.14874
43	D7	30	IMRS	14.3628	3.01065
43	D7	31	IMRS	15.1723	3.81531
43	D7	32	IMRS	15.9654	4.60344
43	D7	33	IMRS	16.687	5.32017
43	D7	34	IMRS	17.3559	5.98422
43	D7	35	IMRS	17.9394	6.56283
43	D7	36	IMRS	18.45	7.06852
43	D7	37	IMRS	18.9287	7.54228
43	D7	38	IMRS	19.3793	7.98802
43	D7	39	IMRS	19.7337	8.33749
44	D8	1
44	D8	2
44	D8	3
44	D8	4
44	D8	5
44	D8	6
44	D8	7
44	D8	8
44	D8	9
44	D8	10
44	D8	11
44	D8	12
44	D8	13
44	D8	14
44	D8	15
44	D8	16
44	D8	17
44	D8	18
44	D8	19
44	D8	20
44	D8	21
44	D8	22
44	D8	23
44	D8	24
44	D8	25
44	D8	26
44	D8	27
44	D8	28
44	D8	29
44	D8	30
44	D8	31
44	D8	32
44	D8	33
44	D8	34
44	D8	35
44	D8	36
44	D8	37
44	D8	38
44	D8	39
45	D9	1
45	D9	2
45	D9	3
45	D9	4
45	D9	5
45	D9	6
45	D9	7
45	D9	8
45	D9	9
45	D9	10
45	D9	11
45	D9	12
45	D9	13
45	D9	14
45	D9	15
45	D9	16
45	D9	17
45	D9	18
45	D9	19
45	D9	20
45	D9	21
45	D9	22
45	D9	23
45	D9	24
45	D9	25
45	D9	26
45	D9	27
45	D9	28
45	D9	29
45	D9	30
45	D9	31
45	D9	32
45	D9	33
45	D9	34
45	D9	35
45	D9	36
45	D9	37
45	D9	38
45	D9	39
46	D10	1
46	D10	2
46	D10	3
46	D10	4
46	D10	5
46	D10	6
46	D10	7
46	D10	8
46	D10	9
46	D10	10
46	D10	11
46	D10	12
46	D10	13
46	D10	14
46	D10	15
46	D10	16
46	D10	17
46	D10	18
46	D10	19
46	D10	20
46	D10	21
46	D10	22
46	D10	23
46	D10	24
46	D10	25
46	D10	26
46	D10	27
46	D10	28
46	D10	29
46	D10	30
46	D10	31
46	D10	32
46	D10	33
46	D10	34
46	D10	35
46	D10	36
46	D10	37
46	D10	38
46	D10	39
47	D11	1
47	D11	2
47	D11	3
47	D11	4
47	D11	5
47	D11	6
47	D11	7
47	D11	8
47	D11	9
47	D11	10
47	D11	11
47	D11	12
47	D11	13
47	D11	14
47	D11	15
47	D11	16
47	D11	17
47	D11	18
47	D11	19
47	D11	20
47	D11	21
47	D11	22
47	D11	23
47	D11	24
47	D11	25
47	D11	26
47	D11	27
47	D11	28
47	D11	29
47	D11	30
47	D11	31
47	D11	32
47	D11	33
47	D11	34
47	D11	35
47	D11	36
47	D11	37
47	D11	38
47	D11	39
48	D12	1
48	D12	2
48	D12	3
48	D12	4
48	D12	5
48	D12	6
48	D12	7
48	D12	8
48	D12	9
48	D12	10
48	D12	11
48	D12	12
48	D12	13
48	D12	14
48	D12	15
48	D12	16
48	D12	17
48	D12	18
48	D12	19
48	D12	20
48	D12	21
48	D12	22
48	D12	23
48	D12	24
48	D12	25
48	D12	26
48	D12	27
48	D12	28
48	D12	29
48	D12	30
48	D12	31
48	D12	32
48	D12	33
48	D12	34
48	D12	35
48	D12	36
48	D12	37
48	D12	38
48	D12	39
49	E1	1	IMRS	12.7492	-0.0557092
49	E1	2	IMRS	12.756	-0.0551605
49	E1	3	IMRS	12.7787	-0.038614
49	E1	4	IMRS	12.8235	9.20409e-06
49	E1	5	IMRS	12.8328	0.00311564
49	E1	6	IMRS	12.8294	-0.00649708
49	E1	7	IMRS	12.8419	-0.000203459
49	E1	8	IMRS	12.8426	-0.00573636
49	E1	9	IMRS	12.8765	0.0220292
49	E1	10	IMRS	12.8902	0.0295092
49	E1	11	IMRS	12.8527	-0.0141582
49	E1	12	IMRS	12.8465	-0.0266139
49	E1	13	IMRS	12.907	0.0276725
49	E1	14	IMRS	12.9404	0.0548658
49	E1	15	IMRS	12.9206	0.02889
49	E1	16	IMRS	12.8898	-0.00806553
49	E1	17	IMRS	12.8915	-0.0125742
49	E1	18	IMRS	12.9014	-0.0089108
49	E1	19	IMRS	12.9119	-0.00462848
49	E1	20	IMRS	12.8826	-0.0400896
49	E1	21	IMRS	12.8845	-0.0443913
49	E1	22	IMRS	12.9173	-0.0177577
49	E1	23	IMRS	12.9583	0.0170679
49	E1	24	IMRS	12.9711	0.0235904
49	E1	25	IMRS	13.0038	0.0501363
49	E1	26	IMRS	13.1476	0.187714
49	E1	27	IMRS	13.4298	0.463729
49	E1	28	IMRS	13.8833	0.91107
49	E1	29	IMRS	14.5315	1.553
49	E1	30	IMRS	15.3876	2.40296
49	E1	31	IMRS	16.3349	3.34406
49	E1	32	IMRS	17.2316	4.23455
49	E1	33	IMRS	18.0375	5.03424
49	E1	34	IMRS	18.7458	5.73634
49	E1	35	IMRS	19.4749	6.45929
49	E1	36	IMRS	20.2606	7.23872
49	E1	37	IMRS	20.8519	7.82382
49	E1	38	IMRS	21.2604	8.22612
49	E1	39	IMRS	21.6271	8.58664
50	E2	1	IMRS	12.4533	-0.0319582
50	E2	2	IMRS	12.4836	-0.00490536
50	E2	3	IMRS	12.4823	-0.00939146
50	E2	4	IMRS	12.4641	-0.0308711
50	E2	5	IMRS	12.4847	-0.0135333
50	E2	6	IMRS	12.5043	0.00289469
50	E2	7	IMRS	12.5183	0.0136083
50	E2	8	IMRS	12.5306	0.0227463
50	E2	9	IMRS	12.5254	0.0143187
50	E2	10	IMRS	12.5178	0.00347447
50	E2	11	IMRS	12.5231	0.00547431
50	E2	12	IMRS	12.5358	0.0150082
50	E2	13	IMRS	12.5216	-0.00250511
50	E2	14	IMRS	12.5146	-0.0127581
50	E2	15	IMRS	12.533	0.00247686
50	E2	16	IMRS	12.5549	0.0211183
50	E2	17	IMRS	12.5524	0.0154172
50	E2	18	IMRS	12.5236	-0.0166243
50	E2	19	IMRS	12.5323	-0.0111588
50	E2	20	IMRS	12.527	-0.0196952
50	E2	21	IMRS	12.5179	-0.0320367
50	E2	22	IMRS	12.5478	-0.00543206
50	E2	23	IMRS	12.5834	0.0269385
50	E2	24	IMRS	12.5974	0.037735
50	E2	25	IMRS	12.7025	0.139601
50	E2	26	IMRS	12.8429	0.27673
50	E2	27	IMRS	13.0664	0.497043
50	E2	28	IMRS	13.48	0.90736
50	E2	29	IMRS	14.1444	1.56854
50	E2	30	IMRS	14.9771	2.39801
50	E2	31	IMRS	15.8748	3.29247
50	E2	32	IMRS	16.7102	4.1246
50	E2	33	IMRS	17.5333	4.94452
50	E2	34	IMRS	18.3854	5.79341
50	E2	35	IMRS	19.0913	6.49608
50	E2	36	IMRS	19.7393	7.14079
50	E2	37	IMRS	20.3061	7.7044
50	E2	38	IMRS	20.7962	8.19119
50	E2	39	IMRS	21.2245	8.61633
51	E3	1	IMRS	12.4652	-0.118997
51	E3	2	IMRS	12.4943	-0.0899062
51	E3	3	IMRS	12.5222	-0.0619076
51	E3	4	IMRS	12.575	-0.00915728
[truncated: 1,790 more rows]

## Sheet: Results
Block Type	96-Well 0.2-mL Block
Calibration Background is expired	No
Calibration Background performed on	10-09-2021
Calibration Pure Dye ABY is expired	No
Calibration Pure Dye ABY performed on	10-09-2021
Calibration Pure Dye CY5 is expired	No
Calibration Pure Dye CY5 performed on	10-09-2021
Calibration Pure Dye FAM is expired	No
Calibration Pure Dye FAM performed on	10-09-2021
Calibration Pure Dye JUN is expired	No
Calibration Pure Dye JUN performed on	10-09-2021
Calibration Pure Dye MUSTANG PURPLE is expired	No
Calibration Pure Dye MUSTANG PURPLE performed on	10-09-2021
Calibration Pure Dye NED is expired	No
Calibration Pure Dye NED performed on	10-09-2021
Calibration Pure Dye ROX is expired	No
Calibration Pure Dye ROX performed on	10-09-2021
Calibration Pure Dye SYBR is expired	No
Calibration Pure Dye SYBR performed on	10-09-2021
Calibration Pure Dye TAMRA is expired	No
Calibration Pure Dye TAMRA performed on	10-09-2021
Calibration Pure Dye VIC is expired	No
Calibration Pure Dye VIC performed on	10-09-2021
Calibration ROI is expired	No
Calibration ROI performed on	10-08-2021
Calibration Uniformity is expired	No
Calibration Uniformity performed on	10-08-2021
Chemistry	TAQMAN
Date Created	2023-12-19 22:30:57 PM EAT
Experiment Barcode
Experiment Comment
Experiment File Name	C:\Users\OMBENI\OneDrive\Desktop\BIOINFORMATICS\Eds 3.eds
Experiment Name	2023-09-05_101140
Experiment Run End Time	2023-10-04 15:54:36 PM EAT
Experiment Type	Standard Curve
Instrument Name	SATREPS_QS5
Instrument Serial Number	272529713
Instrument Type	QuantStudio™ 5 System
Passive Reference	ROX
Post-read Stage/Step
Pre-read Stage/Step
Quantification Cycle Method	Ct
Signal Smoothing On	true
Stage/ Cycle where Ct Analysis is performed	Stage2, Step2
User Name
Well	Well Position	Omit	Sample Name	Target Name	Task	Reporter	Quencher	CT	Ct Mean	Ct SD	Quantity	Quantity Mean	Quantity SD	Y-Intercept	R(superscript 2)	Slope	Efficiency	Automatic Ct Threshold	Ct Threshold	Automatic Baseline	Baseline Start	Baseline End	Amp Status	Comments	Cq Conf	AMPNC	HIGHSD	PRFLOW	NOISE	CQCONF	OUTLIERRG
1	A1	FALSE	S.man 1	IMRS	STANDARD	FAM	None	Undetermined	12.7217	1.08308	10			22.6719	0.1811	-1.7007	287.252	TRUE	0.273738	TRUE	3	9	No Amp		0	N	N	N	N	Y	N
2	A2	FALSE	S.man 1	IMRS	STANDARD	FAM	None	13.4876	12.7217	1.08308	10			22.6719	0.1811	-1.7007	287.252	TRUE	0.273738	TRUE	3	9	Amp		0.950711	N	Y	N	N	N	N
3	A3	FALSE	S.man 1	IMRS	STANDARD	FAM	None	11.9559	12.7217	1.08308	10			22.6719	0.1811	-1.7007	287.252	TRUE	0.273738	TRUE	3	8	Amp		0.720489	N	Y	N	N	Y	N
5	A5	FALSE	S.haem 1	IMRS	STANDARD	FAM	None	15.566	15.5525	0.23037	10			22.6719	0.1811	-1.7007	287.252	TRUE	0.273738	TRUE	3	10	Amp		0.981499	N	N	N	N	N	N
6	A6	FALSE	S.haem 1	IMRS	STANDARD	FAM	None	15.7758	15.5525	0.23037	10			22.6719	0.1811	-1.7007	287.252	TRUE	0.273738	TRUE	3	12	Amp		0.950835	N	N	N	N	N	N
7	A7	FALSE	S.haem 1	IMRS	STANDARD	FAM	None	15.3157	15.5525	0.23037	10			22.6719	0.1811	-1.7007	287.252	TRUE	0.273738	TRUE	3	10	Amp		0.927336	N	N	N	N	N	N
13	B1	FALSE	S.man 2	IMRS	STANDARD	FAM	None	28.7718	20.6655	7.02026	1			22.6719	0.1811	-1.7007	287.252	TRUE	0.273738	TRUE	3	17	No Amp		0.2589	N	Y	N	N	Y	Y
14	B2	FALSE	S.man 2	IMRS	STANDARD	FAM	None	16.5839	20.6655	7.02026	1			22.6719	0.1811	-1.7007	287.252	TRUE	0.273738	TRUE	3	11	Amp		0.965813	N	Y	N	N	N	N
15	B3	FALSE	S.man 2	IMRS	STANDARD	FAM	None	16.6409	20.6655	7.02026	1			22.6719	0.1811	-1.7007	287.252	TRUE	0.273738	TRUE	3	13	Amp		0.970722	N	Y	N	N	N	N
17	B5	FALSE	S.haem 2	IMRS	STANDARD	FAM	None	19.0764	18.9201	0.135526	1			22.6719	0.1811	-1.7007	287.252	TRUE	0.273738	TRUE	3	13	Amp		0.95992	N	N	N	N	N	N
18	B6	FALSE	S.haem 2	IMRS	STANDARD	FAM	None	18.8361	18.9201	0.135526	1			22.6719	0.1811	-1.7007	287.252	TRUE	0.273738	TRUE	3	13	Amp		0.967211	N	N	N	N	N	N
19	B7	FALSE	S.haem 2	IMRS	STANDARD	FAM	None	18.8477	18.9201	0.135526	1			22.6719	0.1811	-1.7007	287.252	TRUE	0.273738	TRUE	3	14	Amp		0.955864	N	N	N	N	N	N
25	C1	FALSE	S.man 3	IMRS	STANDARD	FAM	None	16.7154	18.5713	1.60895	0.1			22.6719	0.1811	-1.7007	287.252	TRUE	0.273738	TRUE	3	15	Amp		0.186299	N	Y	Y	Y	Y	N
26	C2	FALSE	S.man 3	IMRS	STANDARD	FAM	None	19.4259	18.5713	1.60895	0.1			22.6719	0.1811	-1.7007	287.252	TRUE	0.273738	TRUE	3	15	Amp		0.984931	N	Y	N	N	N	N
27	C3	FALSE	S.man 3	IMRS	STANDARD	FAM	None	19.5727	18.5713	1.60895	0.1			22.6719	0.1811	-1.7007	287.252	TRUE	0.273738	TRUE	3	15	Amp		0.976858	N	Y	N	N	N	N
29	C5	FALSE	S.haem 3	IMRS	STANDARD	FAM	None	22.2069	22.2494	0.160685	0.1			22.6719	0.1811	-1.7007	287.252	TRUE	0.273738	TRUE	3	17	Amp		0.973906	N	N	N	N	N	N
30	C6	FALSE	S.haem 3	IMRS	STANDARD	FAM	None	22.4271	22.2494	0.160685	0.1			22.6719	0.1811	-1.7007	287.252	TRUE	0.273738	TRUE	3	17	Amp		0.958771	N	N	N	N	N	N
31	C7	FALSE	S.haem 3	IMRS	STANDARD	FAM	None	22.1143	22.2494	0.160685	0.1			22.6719	0.1811	-1.7007	287.252	TRUE	0.273738	TRUE	3	18	Amp		0.965256	N	N	N	N	N	N
37	D1	FALSE	S.man 4	IMRS	STANDARD	FAM	None	23.3693	23.2434	0.137942	0.01			22.6719	0.1811	-1.7007	287.252	TRUE	0.273738	TRUE	3	18	Amp		0.95615	N	N	N	N	N	N
38	D2	FALSE	S.man 4	IMRS	STANDARD	FAM	None	23.265	23.2434	0.137942	0.01			22.6719	0.1811	-1.7007	287.252	TRUE	0.273738	TRUE	3	19	Amp		0.975133	N	N	N	N	N	N
39	D3	FALSE	S.man 4	IMRS	STANDARD	FAM	None	23.096	23.2434	0.137942	0.01			22.6719	0.1811	-1.7007	287.252	TRUE	0.273738	TRUE	3	19	Amp		0.978265	N	N	N	N	N	N
41	D5	FALSE	S.haem 4	IMRS	STANDARD	FAM	None	25.6014	25.6984	0.0873235	0.01			22.6719	0.1811	-1.7007	287.252	TRUE	0.273738	TRUE	3	22	Amp		0.964605	N	N	N	N	N	N
42	D6	FALSE	S.haem 4	IMRS	STANDARD	FAM	None	25.7707	25.6984	0.0873235	0.01			22.6719	0.1811	-1.7007	287.252	TRUE	0.273738	TRUE	3	19	Amp		0.965332	N	N	N	N	N	N
43	D7	FALSE	S.haem 4	IMRS	STANDARD	FAM	None	25.7231	25.6984	0.0873235	0.01			22.6719	0.1811	-1.7007	287.252	TRUE	0.273738	TRUE	3	20	Amp		0.958849	N	N	N	N	N	N
49	E1	FALSE	S.man 5	IMRS	STANDARD	FAM	None	26.3622	26.0996	0.236915	0.001			22.6719	0.1811	-1.7007	287.252	TRUE	0.273738	TRUE	3	20	Amp		0.951669	N	N	N	N	N	N
50	E2	FALSE	S.man 5	IMRS	STANDARD	FAM	None	26.0347	26.0996	0.236915	0.001			22.6719	0.1811	-1.7007	287.252	TRUE	0.273738	TRUE	3	20	Amp		0.97371	N	N	N	N	N	N
51	E3	FALSE	S.man 5	IMRS	STANDARD	FAM	None	25.9018	26.0996	0.236915	0.001			22.6719	0.1811	-1.7007	287.252	TRUE	0.273738	TRUE	3	21	Amp		0.957565	N	N	N	N	N	N
53	E5	FALSE	S.haem 5	IMRS	STANDARD	FAM	None	28.889	28.8514	0.177643	0.001			22.6719	0.1811	-1.7007	287.252	TRUE	0.273738	TRUE	3	25	Amp		0.965627	N	N	N	N	N	N
54	E6	FALSE	S.haem 5	IMRS	STANDARD	FAM	None	28.6579	28.8514	0.177643	0.001			22.6719	0.1811	-1.7007	287.252	TRUE	0.273738	TRUE	3	23	Amp		0.964314	N	N	N	N	N	N
55	E7	FALSE	S.haem 5	IMRS	STANDARD	FAM	None	29.0072	28.8514	0.177643	0.001			22.6719	0.1811	-1.7007	287.252	TRUE	0.273738	TRUE	3	24	Amp		0.968495	N	N	N	N	N	N
61	F1	FALSE	S.man 6	IMRS	STANDARD	FAM	None	29.2183	29.2469	0.0250327	0.0001			22.6719	0.1811	-1.7007	287.252	TRUE	0.273738	TRUE	3	24	Amp		0.947667	N	N	N	N	N	N
62	F2	FALSE	S.man 6	IMRS	STANDARD	FAM	None	29.2579	29.2469	0.0250327	0.0001			22.6719	0.1811	-1.7007	287.252	TRUE	0.273738	TRUE	3	24	Amp		0.961212	N	N	N	N	N	N
63	F3	FALSE	S.man 6	IMRS	STANDARD	FAM	None	29.2646	29.2469	0.0250327	0.0001			22.6719	0.1811	-1.7007	287.252	TRUE	0.273738	TRUE	3	26	Amp		0.958455	N	N	N	N	N	N
65	F5	FALSE	S.haem 6	IMRS	STANDARD	FAM	None	32.898	32.9027	0.14821	0.0001			22.6719	0.1811	-1.7007	287.252	TRUE	0.273738	TRUE	3	28	Amp		0.951105	N	N	N	N	N	N
66	F6	FALSE	S.haem 6	IMRS	STANDARD	FAM	None	32.7569	32.9027	0.14821	0.0001			22.6719	0.1811	-1.7007	287.252	TRUE	0.273738	TRUE	3	29	Amp		0.954878	N	N	N	N	N	N
67	F7	FALSE	S.haem 6	IMRS	STANDARD	FAM	None	33.0532	32.9027	0.14821	0.0001			22.6719	0.1811	-1.7007	287.252	TRUE	0.273738	TRUE	3	27	Amp		0.931527	N	N	N	N	N	N
73	G1	FALSE	A. Lumb1	IMRS	STANDARD	FAM	None	34.5557	34.8618	0.32792	2			22.6719	0.1811	-1.7007	287.252	TRUE	0.273738	TRUE	3	31	Amp		0.910549	N	N	N	N	N	N
74	G2	FALSE	A. Lumb1	IMRS	STANDARD	FAM	None	35.2079	34.8618	0.32792	2			22.6719	0.1811	-1.7007	287.252	TRUE	0.273738	TRUE	3	29	Amp		0.882684	N	N	N	N	N	N
75	G3	FALSE	A. Lumb1	IMRS	STANDARD	FAM	None	34.8217	34.8618	0.32792	2			22.6719	0.1811	-1.7007	287.252	TRUE	0.273738	TRUE	3	28	Amp		0.939975	N	N	N	N	N	N
77	G5	FALSE	A. lumb2	IMRS	STANDARD	FAM	None	34.4231	34.6634	0.278893	2			22.6719	0.1811	-1.7007	287.252	TRUE	0.273738	TRUE	3	29	Amp		0.924171	N	N	N	N	N	N
78	G6	FALSE	A. lumb2	IMRS	STANDARD	FAM	None	34.5979	34.6634	0.278893	2			22.6719	0.1811	-1.7007	287.252	TRUE	0.273738	TRUE	3	28	Amp		0.899564	N	N	N	N	N	N
79	G7	FALSE	A. lumb2	IMRS	STANDARD	FAM	None	34.9692	34.6634	0.278893	2			22.6719	0.1811	-1.7007	287.252	TRUE	0.273738	TRUE	3	31	Amp		0.872452	N	N	N	N	N	N
85	H1	FALSE	ntc	IMRS	NTC	FAM	None	35.8334						22.6719	0.1811	-1.7007	287.252	TRUE	0.273738	TRUE	3	31	Amp		0.867244	N	N	N	N	N	N
86	H2	FALSE	ntc	IMRS	NTC	FAM	None	34.8045						22.6719	0.1811	-1.7007	287.252	TRUE	0.273738	TRUE	3	30	Amp		0.911192	Y	N	N	N	N	N
87	H3	FALSE	ntc	IMRS	NTC	FAM	None	34.4332						22.6719	0.1811	-1.7007	287.252	TRUE	0.273738	TRUE	3	30	Amp		0.91161	Y	N	N	N	N	N
89	H5	FALSE	ntc	IMRS	NTC	FAM	None	35.037						22.6719	0.1811	-1.7007	287.252	TRUE	0.273738	TRUE	3	29	Amp		0.88059	N	N	N	N	N	N
90	H6	FALSE	ntc	IMRS	NTC	FAM	None	34.4638						22.6719	0.1811	-1.7007	287.252	TRUE	0.273738	TRUE	3	31	Amp		0.910571	Y	N	N	N	N	N
91	H7	FALSE	ntc	IMRS	NTC	FAM	None	35.1749						22.6719	0.1811	-1.7007	287.252	TRUE	0.273738	TRUE	3	30	Amp		0.870525	N	N	N	N	N	N
